# Supplementary material for: Pan-cancer analysis reveals the relationship between RCSD1 immune infiltration and clinical prognosis in human tumors
Source: Front Immunol. 2022 Oct 13;13:1008778. doi: 10.3389/fimmu.2022.1008778 (PMC9606721; doi:10.3389/fimmu.2022.1008778)
Supplement: Supplementary Table 2 — The relationship between RCSD1 and Immunoinhibitors. [file Table_2.xlsx]

## Sheet: Sheet1
		Description	LUAD		LUSC
			rho	P	rho	P
		ADORA2A	0.588	<2.2e-16	0.668	<2.2e-16
		BTLA	0.822	<2.2e-16	0.825	<2.2e-16
		CD96	0.755	<2.2e-16	0.839	<2.2e-16
		CD160	0.336	5.6e-15	0.427	<2.2e-16
		CD244	0.65	<2.2e-16	0.734	<2.2e-16
		CD274	0.449	<2.2e-16	0.328	6.98e-14
		CSF1R	0.655	<2.2e-16	0.831	<2.2e-16
		CTLA4	0.642	<2.2e-16	0.781	<2.2e-16
		HAVCR2	0.665	<2.2e-16	0.846	<2.2e-16
		IDO1	0.385	<2.2e-16	0.497	<2.2e-16
		IL-10	0.583	<2.2e-16	0.626	<2.2e-16
		IL10RB	0.089	0.0436	0.168	0.00016
		KDR	0.164	0.00019	0.53	<2.2e-16
		LAG3	0.465	<2.2e-16	0.637	<2.2e-16
		LGALS9	0.366	1.11e-18	0.592	<2.2e-16
		PDCD1	0.602	<2.2e-16	0.776	<2.2e-16
		PDCD1LG2	0.662	<2.2e-16	0.619	<2.2e-16
		PVRL2	-0.175	6.65e-05	0.118	0.00844
		TGFB1	0.408	<2.2e-16	0.093	0.0379
		TGFBR1	0.173	8.2e-05	0.04	0.376
		TIGIT	0.725	<2.2e-16	0.796	<2.2e-16
		VTCN1	-0.037	0.403	-0.191	1.78e-05
		Bold values indicate P < 0.05.
